# Supplementary material for: Adeno-associated virus-based caveolin-1 delivery via different routes for the prevention of cholesterol gallstone formation
Source: PubMed Central journal article supplement (PMC9609467; doi:10.1186/s12944-022-01718-7), 2022-10-27

# Supplementary Figure 1

Figure 1C

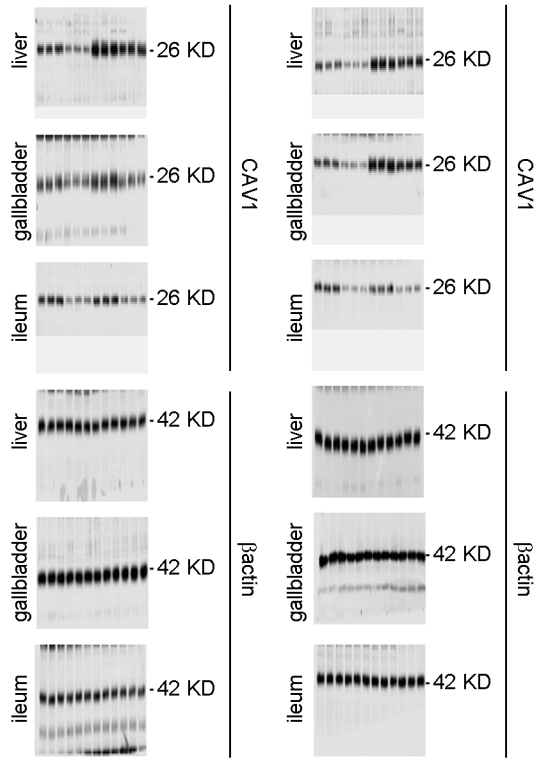

Figure 1D

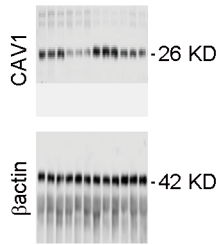

Supplement: 12944_2022_1718_MOESM1_ESM.pdf [file 12944_2022_1718_MOESM1_ESM.pdf]
