# Supplementary material for: Adeno-associated virus-based caveolin-1 delivery via different routes for the prevention of cholesterol gallstone formation
Source: Lipids Health Dis. 2022 Oct 27;21:109. doi: 10.1186/s12944-022-01718-7 (PMC9609467; doi:10.1186/s12944-022-01718-7)
Supplement: Supplementary file 4 — Supplementary Material 4 [file 12944_2022_1718_MOESM4_ESM.xlsx]

## Sheet: Primers
	Supplementary Table 1
	Primers used for qRT-PCR
	gene symbol (mice)		forward primer (5' → 3')				reverse primer (5' → 3')
	18s RNA		GATGGGAAGTACAGCCAGGT				TTTCTTCAGCCTCTCCAGGT
	ABCG5		AGAGTCAGGATGGCCTGTAT				ATGCTGAGCAGGGCCACTAT
	ABCG8		GAGAGCTTCACAGCCCACAA				GCCTGAAGATGTCAGAGCGA
	BSEP		GTGTCTACTTCATGCTTGTGAC				GAGACTTAGATCGTTGACGGAT
	CCKAR		CTGGAGAGATACGGTGCCATC				TGTAAATGGGGTACGGAGTCA
	CYP7a1		TACAGAGTGCTGGCCAAGAG				TTCAAGGATGCACTGGAGAG
	CHRM2		TGGTTTGGCTATTACCAGTCCT				CTGAAGGTGGCGGTTGACTT
	CHRM3		CCTCGCCTTTGTTTCCCAAC				TTGAGGAGAAATTCCCAGAGGT
	MDR2		ATACTGGGAACTTTTCCTTGCC				ACCACCTAGTCCCGAATAGTAGT
	MRP2		GGATGGTGACTGTGGGCTGAT				GGCTGTTCTCCCTTCTCATGG
	MUC1		ACGTGAAGTCACAGCTTATACA				AGGGCAAGGAAATAGACGATAG
	MUC5ac		ATCTGTAAGGAAGCCACGCTAA				CTCCTCGTATGTGACTATCAGG
	NPC1L1		GAGGCCATCTGCTTCTTTCTAG				GTCAAAGATGATTGCTAAGCCA
	Primers used for TaqMan qRT-PCR
	primer		company			Catalogue No
	mmu-miR-145a		Thermofisher			4426961
	18s RNA		Thermofisher			4331183
